# Supplementary material for: Assessing red deer hunting management in the Iberian Peninsula: the importance of longitudinal studies
Source: PeerJ. 2021 Feb 5;9:e10872. doi: 10.7717/peerj.10872 (PMC7869667; doi:10.7717/peerj.10872)
Supplement: Supplemental Information 1 [file peerj-09-10872-s001.xls]

## Sheet: Hoja1
Area	Temp	dens_1	Exponential_growth_rate (rt)	Male hunted/Male total	Female hunted/ female total	Age class 1 hunted /age class 1 total	Age class 2 hunted /age class 2 total
Quintos de Mora	1988	0.458	-0.456988
Quintos de Mora	1989	0.29	0.159065	0.298776	0.065443	0.0382759	0.094003
Quintos de Mora	1990	0.34	0.302281	0.206081	0.0489914	0.0289645	0.0600665
Quintos de Mora	1991	0.46	-0.217723	0.219089	0.291073	0.0490911	0.226942
Quintos de Mora	1992	0.37	-0.209818	0.3021	0.272568	0.0698214	0.214799
Quintos de Mora	1997	0.37	0	0.180368	0.0566618	0.0287721	0.1005
Quintos de Mora	1998	0.37	-0.027399	0.383578	0.0771416	0.0373932	0.137169
Quintos de Mora	2001	0.3	0.0953102	0.406116	0.463309	0.295814	0.380579
Quintos de Mora	2002	0.33	-0.0625204	0.240839	0.156539	0.155633	0.160141
Quintos de Mora	2003	0.31	-0.101783	0.557353	0.32513	0.24516	0.338896
Quintos de Mora	2004	0.28	0.381368	0.773587	0.397699	0.324716	0.403708
Quintos de Mora	2005	0.41	-0.279585	0.478121	0.204216	0.216465	0.21593
Quintos de Mora	2006	0.31	-0.0327898	0.39523	0.188191	0.265233	0.216381
Quintos de Mora	2007	0.3	0.236389	0.138596	0.0744293	0.0950562	0.0881566
Quintos de Mora	2008	0.38	0.0259755	0.202617	0.139367	0.236915	0.139178
Quintos de Mora	2009	0.39	0.0253178	0.196416	0.132449	0.15678	0.128625
Quintos de Mora	2010	0.4	-0.248461	0.183255	0.194543	0.261603	0.15141
Quintos de Mora	2011	0.312	-0.118986	0.149539	0.18788	0.15596	0.146031
Quintos de Mora	2012	0.277	-0.143379	0.291775	0.283412	0.379242	0.241915
Quintos de Mora	2013	0.24	0	0.224519	0.232166	0.241808	0.199409
Quintos de Mora	2014	0.24	0.117783	0.294185	0.324943	0.247768	0.263893
Quintos de Mora	2015	0.27	0.105361	0.217731	0.200864	0.0645932	0.189464
Morera	1989	0.108	0.489274
Morera	1990	0.1775	0.414027	0.666667	0.016129	0	0.0973818
Morera	1991	0.268539	-0.00840341	0.769231	0.314815	0.0487805	0.35425
Morera	1992	0.266292	0.268512	0.836494	0.539474	0.138462	0.412007
Morera	1993	0.348315	0.0878486	2.78539	0.24	0.0860215	0.369531
Morera	1994	0.373034	-0.144248	0.924528	0.375796	0.162162	0.418605
Morera	1995	0.329213	0.464013	2.04519	0.559322	0.4	0.564963
Morera	1996	0.523596	-0.185761	0.842593	0.136364	0.111111	0.1776
Morera	1997	0.434831	-0.218632	0.902655	0.411765	0.282051	0.358081
Morera	1998	0.349438	0.30284	1.90565	0.741071	0.5	0.586205
Morera	1999	0.473034	-0.0945978	0.365677	0.116751	0.0227273	0.129247
Morera	2000	0.430337	-0.334907	0.178856	0.208589	0.0875	0.158953
Morera	2001	0.307865	0.133075	0.799614	0.361111	0.0821918	0.337137
Morera	2002	0.351685	0.0221178	0.6736	0.225806	0.113924	0.258748
Morera	2003	0.359551	-0.0382212	0.581306	0.237705	0.115385	0.24588
Morera	2004	0.346067	-0.074108	0.603012	0.0148148	0.0142857	0.120629
Morera	2005	0.321348	0.238411	0.856318	0.259259	0.157143	0.289735
Morera	2006	0.407865	0.0271729	0.528725	0.216783	0.159091	0.216364
Morera	2007	0.4191	0.00214516	2.01584	0.181818	0.158537	0.211361
Morera	2008	0.42	0.0693746	1.04371	0.353333	0.23	0.318758
Morera	2009	0.45	0.0992349	1.35714	0.242236	0.148936	0.257525
Morera	2010	0.497136	-0.215111	0.195122	0.109756	0.221154	0.10303
Morera	2011	0.400916	-0.0649195	0.857143	0.310078	0.18	0.328
Morera	2012	0.375716	0.0329865	0.978261	0.244275	0.379747	0.309237
Morera	2013	0.388316	0.177887	1.45946	0.304	0.241758	0.370968
Morera	2014	0.463918	-0.303443	1.08571	0.265537	0.284211	0.274194
Morera	2015	0.342497	0.15749	1.11765	0.389381	0.325	0.374429
